# Supplementary material for: Penostatin Derivatives, a Novel Kind of Protein Phosphatase 1B Inhibitors Isolated from Solid Cultures of the Entomogenous Fungus Isaria tenuipes
Source: PubMed Central journal article supplement (PMC6270892; doi:10.3390/molecules19021663), 2014-01-29

## Supplementary File

**Figure S1.** The circular dichroism (CD) spectrum of compound **1**. (A) CD spectrum of compound of **1**; (B) Absorbance curve of compound **1**.

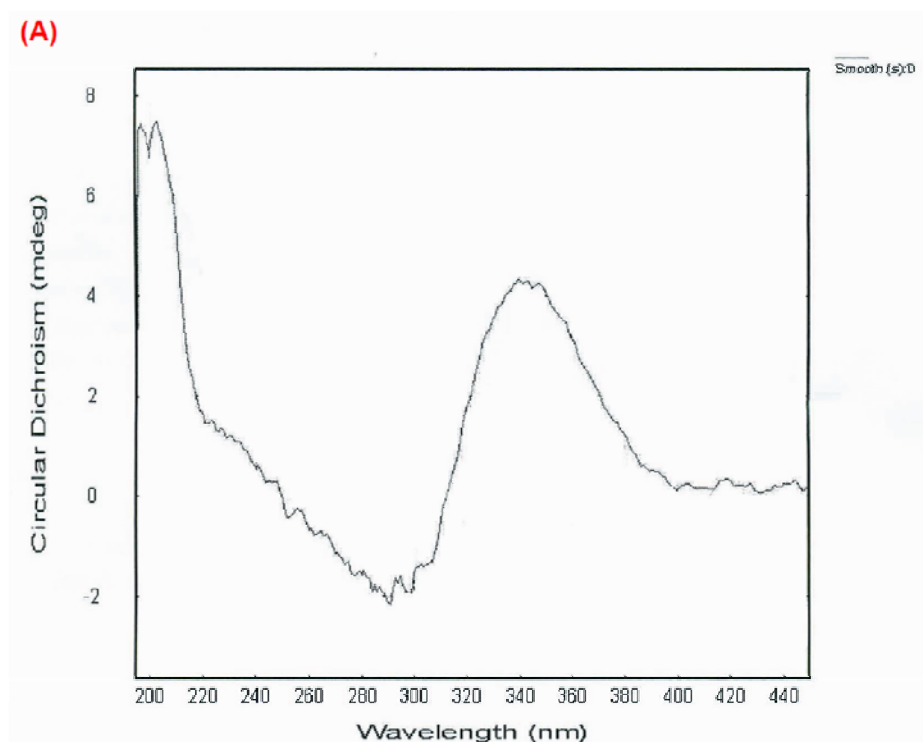

(A)

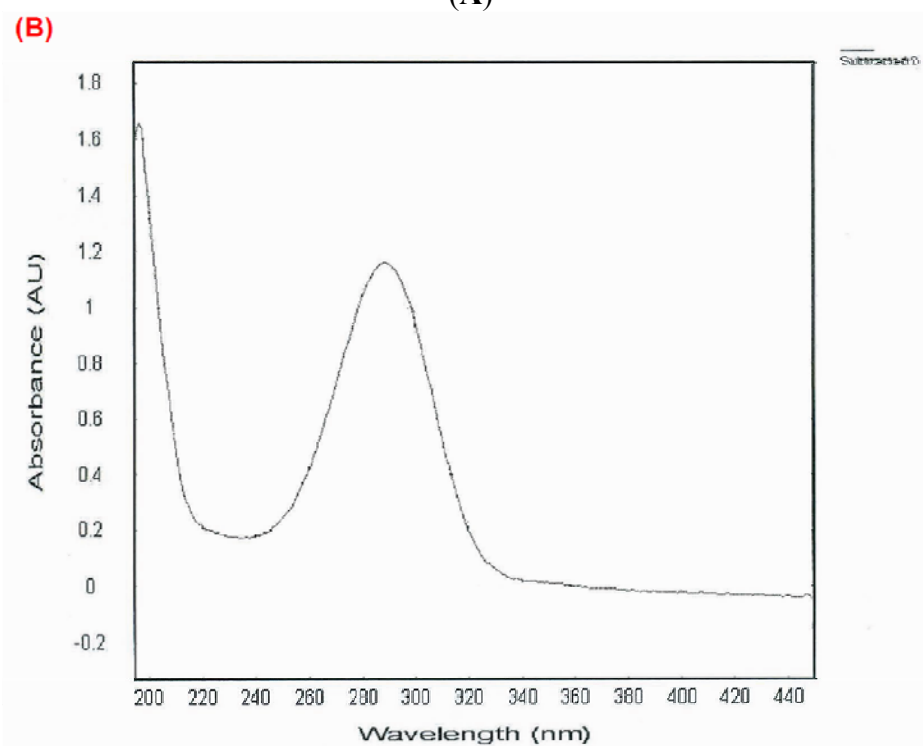

(B)

**Figure S2.** The  $[\alpha]_D$  spectrum of compound 1.

Optical rotation measurement

Model : P-1020 (A060460638)

| No.  | Sample  | Mode   | Data    | Monitor Blank    | Temp. Cell    | Date                                                    | Light Filter | Cycle Time      |
|------|---------|--------|---------|------------------|---------------|---------------------------------------------------------|--------------|-----------------|
|      |         |        |         |                  | Temp Point    | Comment                                                 | Operator     | Integ Time      |
|      |         |        |         |                  |               | Sample Name                                             |              |                 |
| No.1 | 4 (1/3) | Sp.Rot | 59.3330 | 0.0178<br>0.0000 | 13.5<br>10.00 | Mon Jan 20 15:26:48 2014<br>0.00300g/mL MeOH<br>YYCG-31 | Na<br>589nm  | 2 sec<br>10 sec |
| No.2 | 4 (2/3) | Sp.Rot | 59.3330 | 0.0178<br>0.0000 | 13.5<br>10.00 | Mon Jan 20 15:27:01 2014<br>0.00300g/mL MeOH<br>YYCG-31 | Na<br>589nm  | 2 sec<br>10 sec |
| No.3 | 4 (3/3) | Sp.Rot | 59.3330 | 0.0178<br>0.0000 | 13.5<br>10.00 | Mon Jan 20 15:27:15 2014<br>0.00300g/mL MeOH<br>YYCG-31 | Na<br>589nm  | 2 sec<br>10 sec |

**Figure S3.** The UV spectrum of compound 1.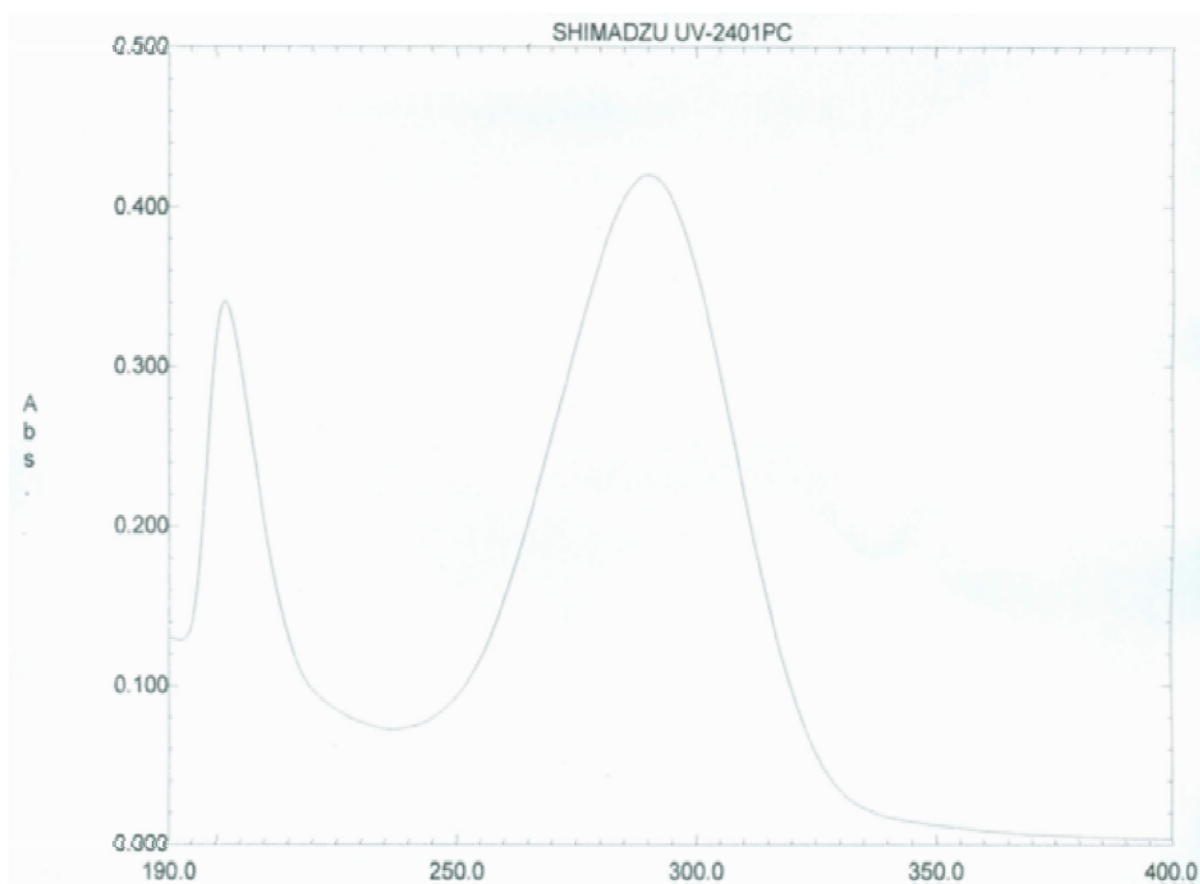

Figure S4. The HIESIMS spectrum of compound 1.

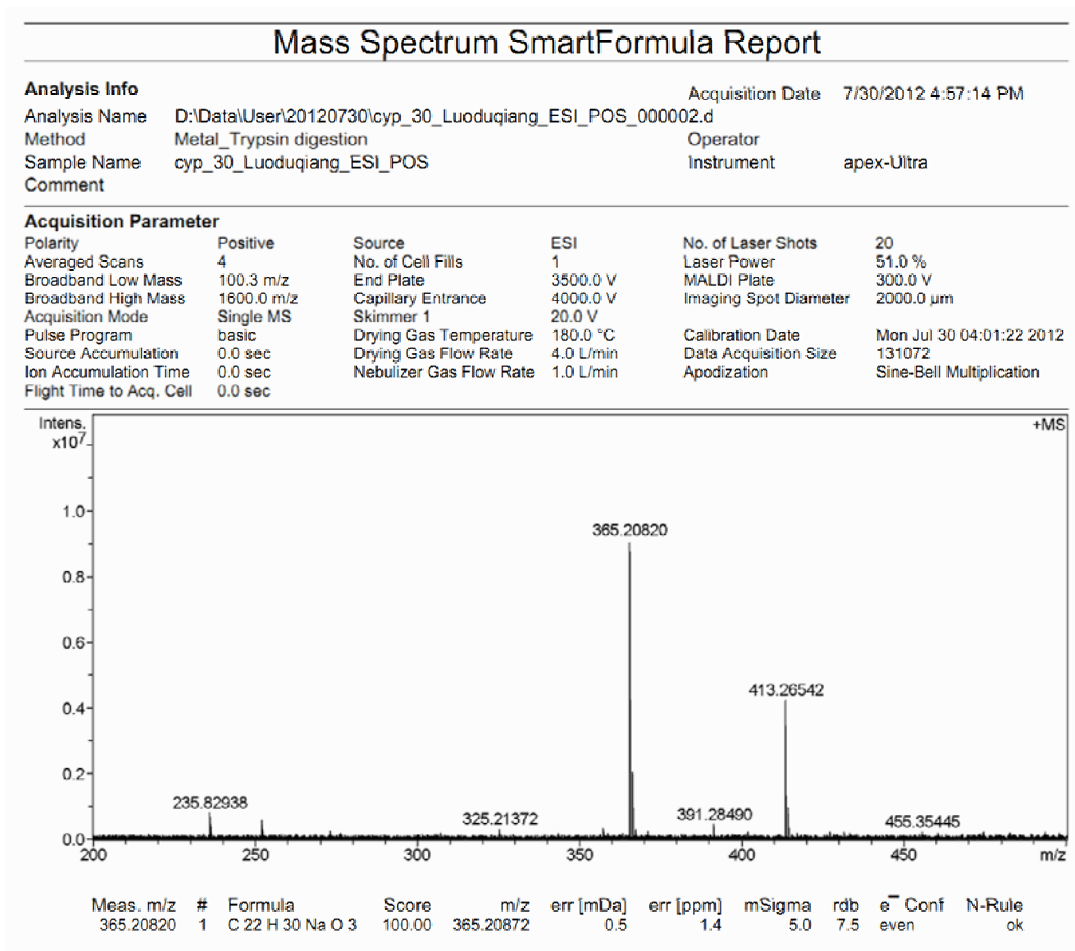Figure S5. The  $^1\text{H}$ -NMR spectrum of compound 1.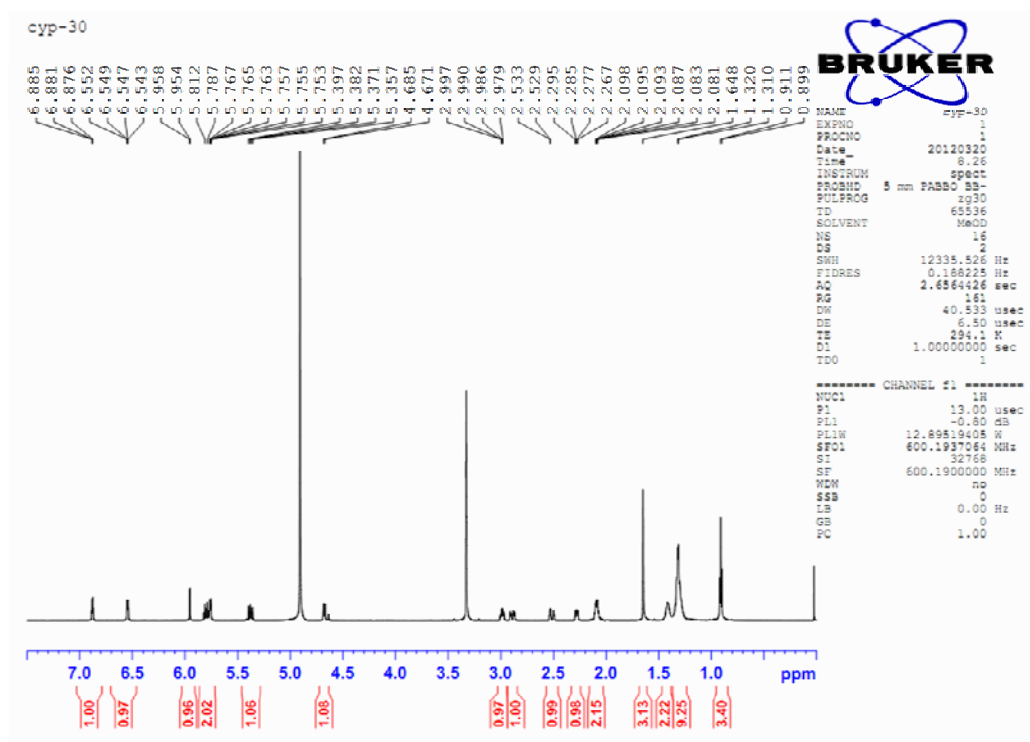

Figure S6. The <sup>13</sup>C-NMR spectrum of compound 1.

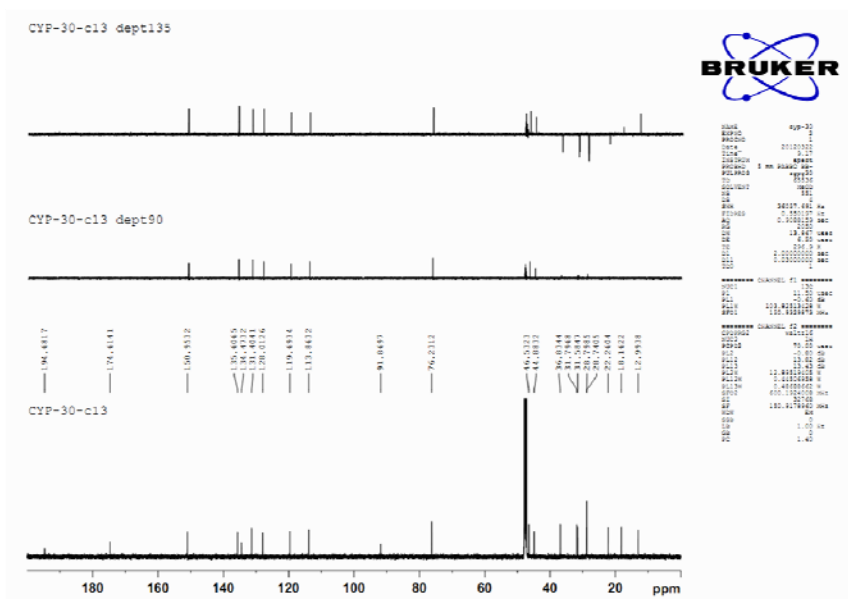

Figure S7. The HMQC spectrum of compound 1.

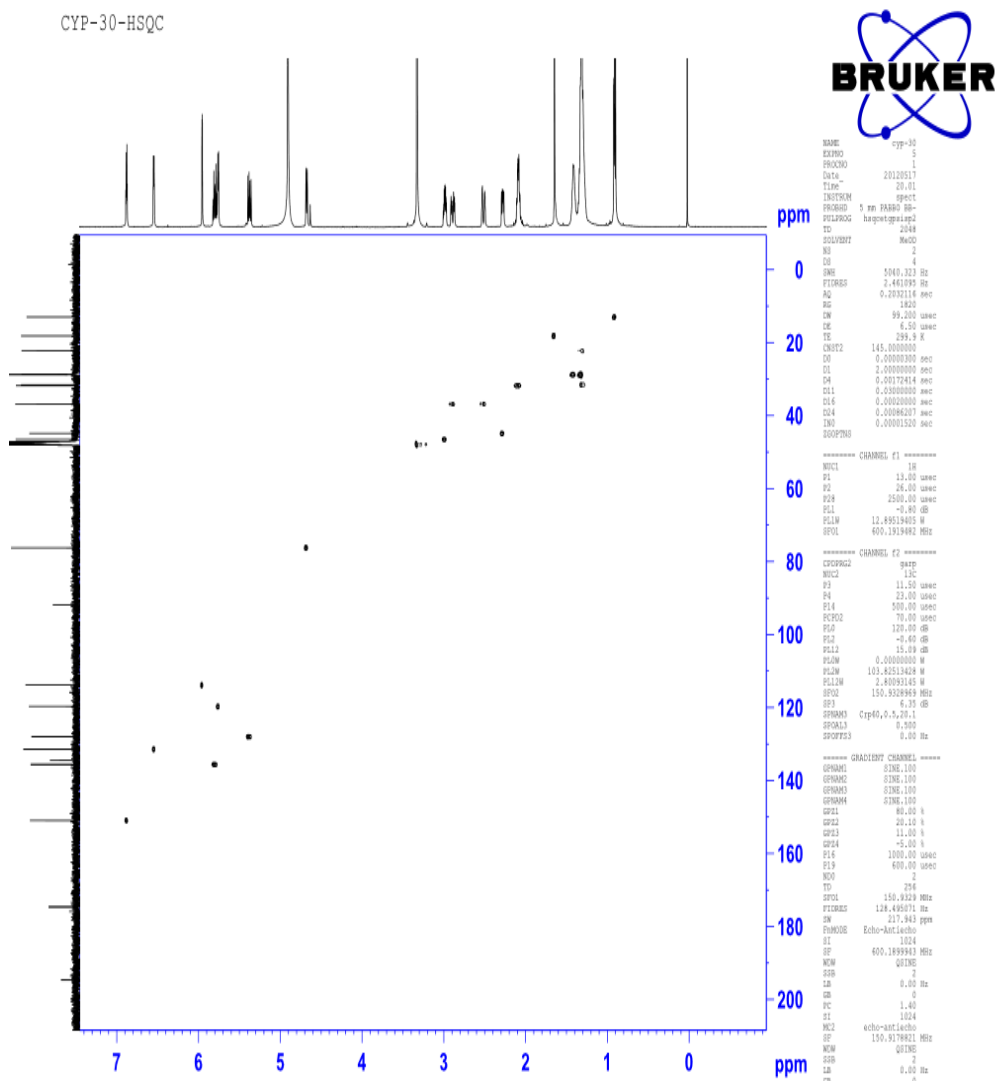

Figure S8. The  $^1\text{H}$ - $^1\text{H}$  COSY spectrum of compound 1.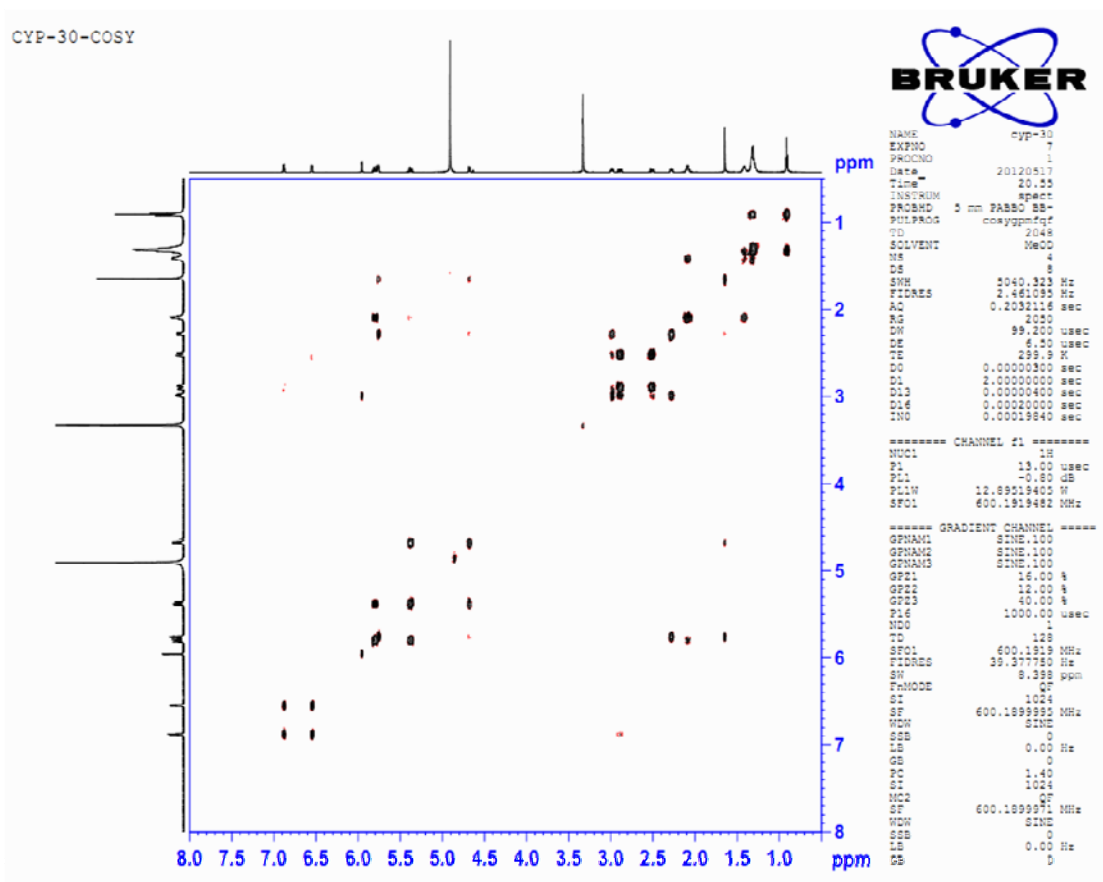

Figure S9. The HMBC spectrum of compound 1.

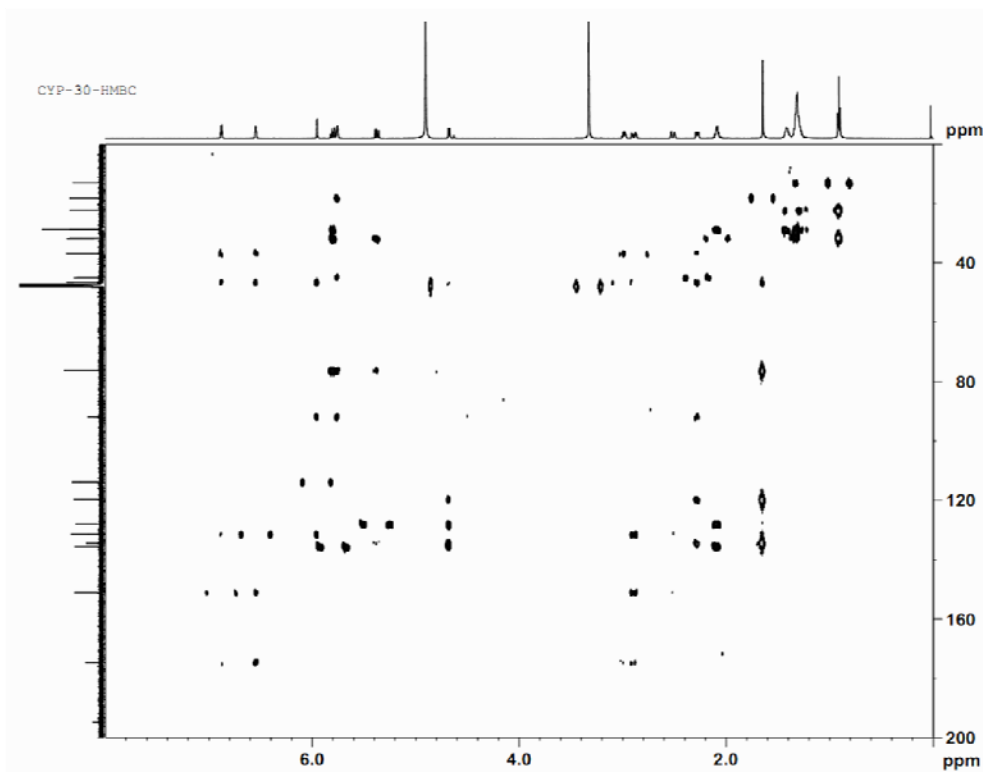

Figure S10. The ROESY spectrum of compound 1.

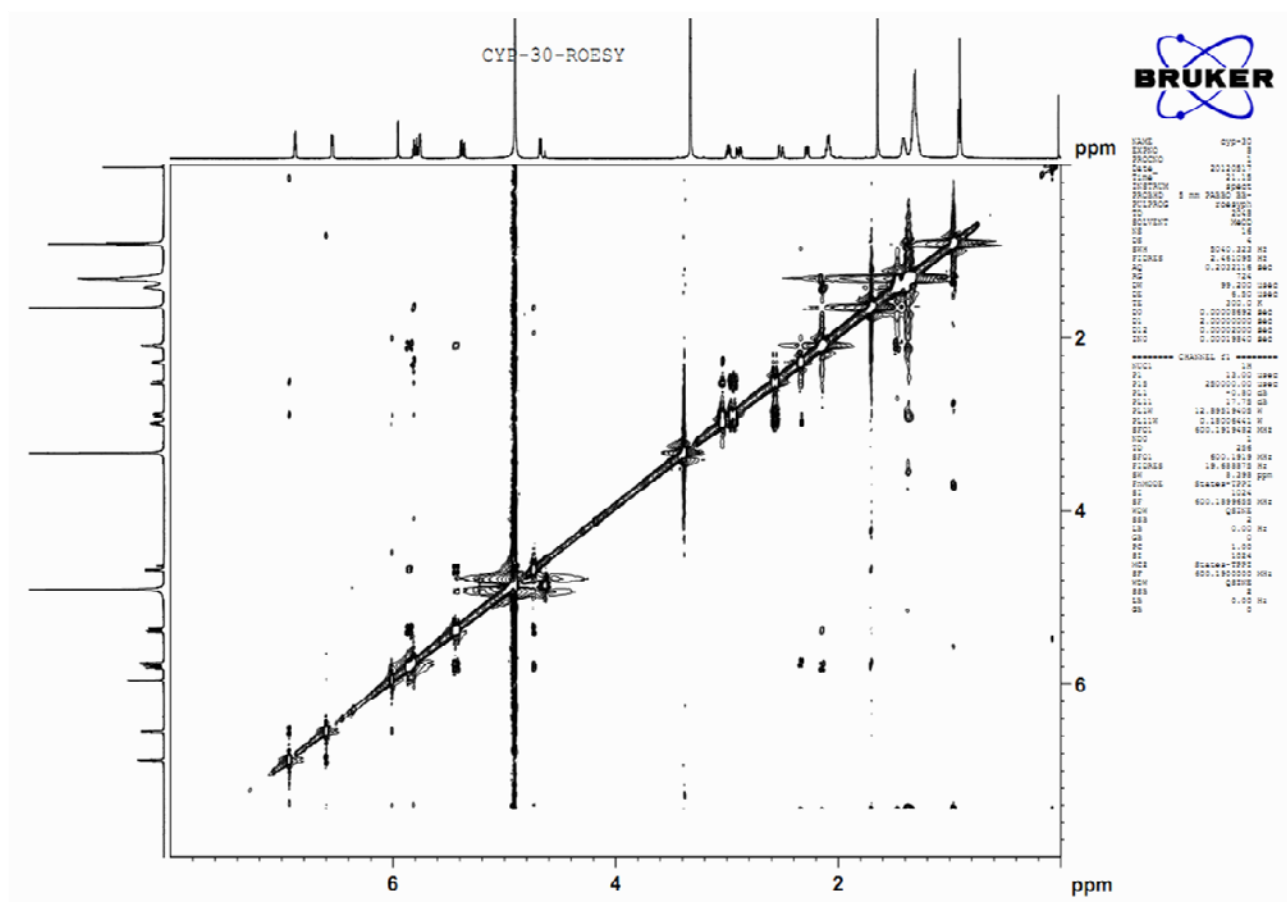

Supplement: molecules-19-01663-s001.pdf [file molecules-19-01663-s001.pdf]
